# Supplementary material
Source: Royal Society of Chemistry journal article supplement (doi:10.1039/d6tb00500d)
Supplement: d6tb00500d1.pdf [file d6tb00500d1.pdf]

## Electronic Supplementary Information (ESI)

# Towards Targeted *Escherichia coli* Fluorescence Biosensor using Quantum Dots Decorated Geothermal Silica Nanoparticles

Shaimah Rinda Sari<sup>a</sup>, Diaz Ayu Widayari<sup>b,c</sup>, Fauzan Aulia<sup>d</sup>, Anis Kristiani<sup>d</sup>, Himawan T.B.M. Petrus<sup>e</sup>, Rizna Triana Dewi<sup>f</sup>, Ni Luh Wulan Septiani<sup>c,g,h</sup>, Brian Yulianto<sup>c,h</sup> and S. N. Aisyiyah Jenie<sup>d,h\*</sup>

<sup>a</sup> Department of Chemistry and Applied Chemistry, Faculty of Science and Engineering, Saga University, 1 Honjomachi, Saga 840-8502, Japan

<sup>b</sup> Master Program of Nanotechnology, Graduate School, Institut Teknologi Bandung (ITB), Jl. Ganesha 10, Bandung 40312, West Java, Indonesia

<sup>c</sup> Advanced Functional Materials Research Group, Faculty of Industrial Technology, Institut Teknologi Bandung, Bandung 40132, Indonesia

<sup>d</sup> Research Centre for Molecular Chemistry, National Research and Innovation Agency (BRIN), Kawasan PUSPIPTEK, Serpong, South Tangerang 15314, Banten, Indonesia

<sup>e</sup> Department of Chemical Engineering (Sustainable Mineral Processing Research Group), Universitas Gadjah Mada, Jl. Grafika No. 2, Yogyakarta, 55281, Indonesia

<sup>f</sup> Research Center for Pharmaceutical Ingredients and Traditional Medicine, National Research and Innovation Agency (BRIN), Cibinong Science Center (CSC), Bogor, West Java 16911, Indonesia

<sup>g</sup> Research Center for Advanced Materials, Research and Innovation Agency (BRIN), Kawasan PUSPIPTEK, Serpong, South Tangerang 15314, Banten, Indonesia

<sup>h</sup> BRIN and ITB Collaborative Research Center for Biosensors and Biodevices, Jl. Ganesha 10, Bandung, West Java, 40132 Indonesia

\*Corresponding authors:

Siti Nurul Aisyiyah Jenie, Ph.D

e-mail : sna.jenie@gmail.com

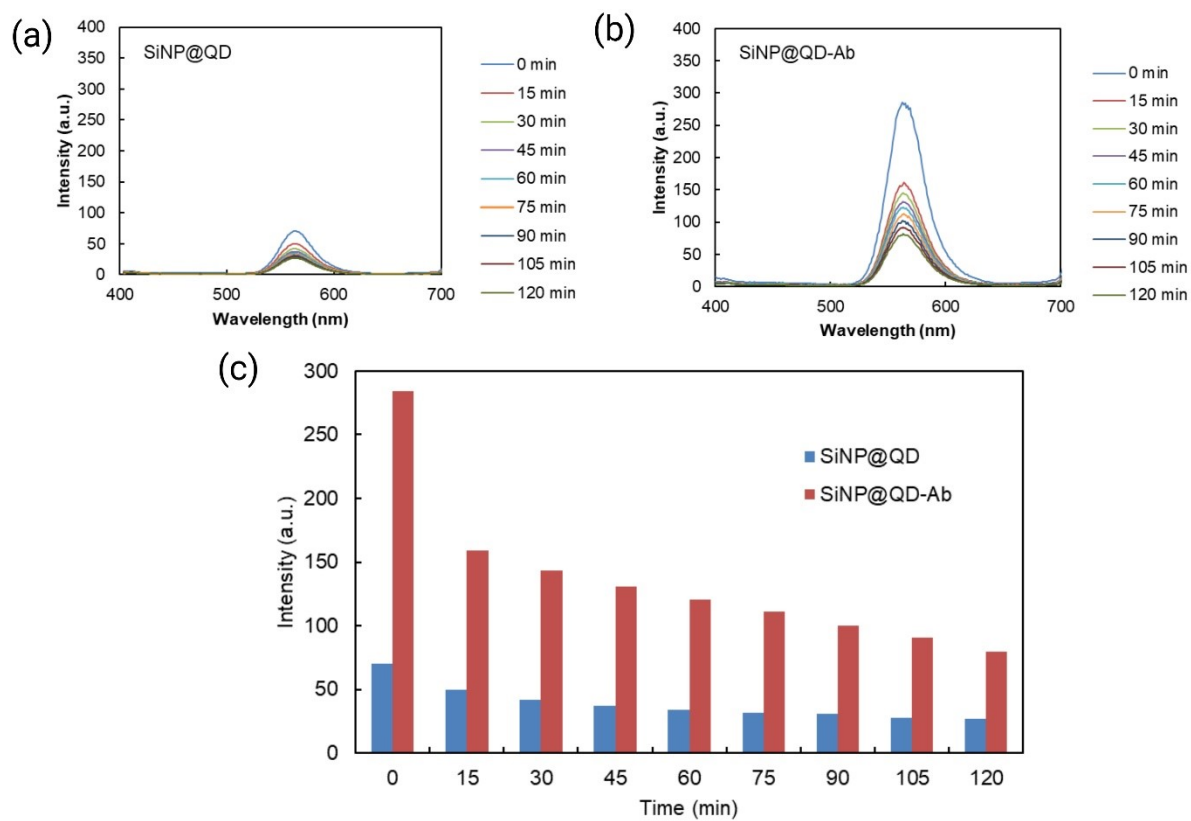

**Fig. S1** Time-dependent fluorescence stability of SiNP@QD and SiNP@QD-Ab over 120 minutes. (a–b) Emission spectra recorded at 0–120 min and (c) Intensity comparison showing gradual decay in both samples.

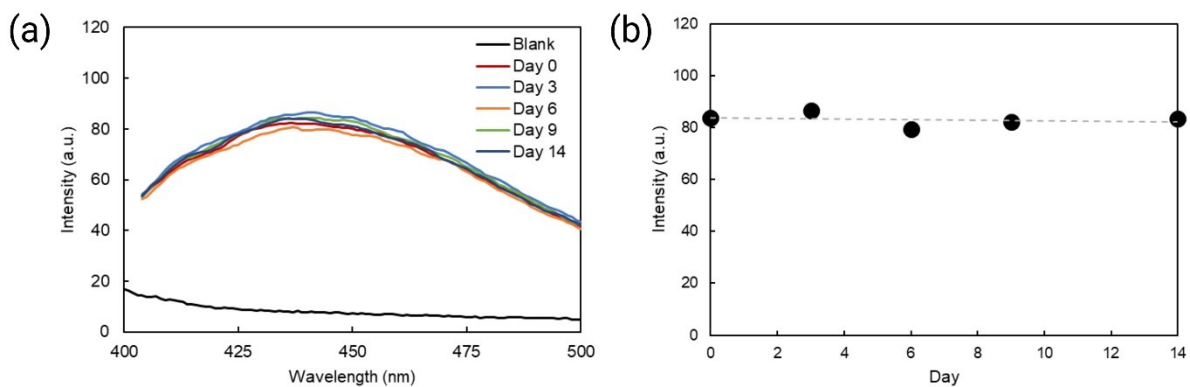

**Fig. S2** Fluorescence stability of SiNP@QD-Ab stored at 4 °C for 14 days in the presence of  $10^4$  CFU/mL *E. coli*, showing minimal changes in emission intensity and peak position throughout the storage period.

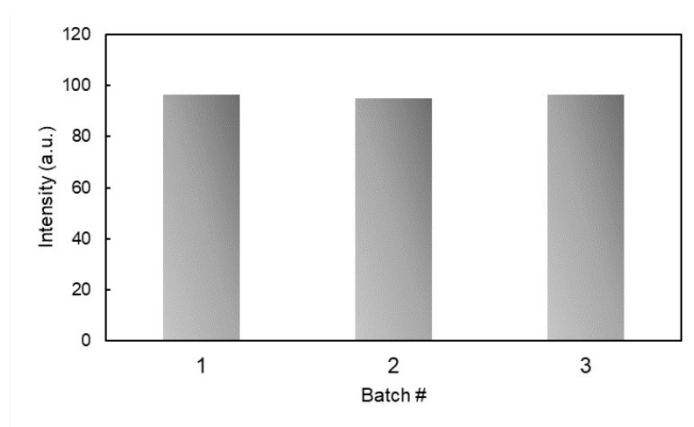

**Fig. S3** Batch-to-batch reproducibility of SiNP@QD-Ab evaluated at  $10^5$  CFU/mL *E. coli*, with three independently synthesized batches exhibiting highly consistent fluorescence intensities at 435 nm.

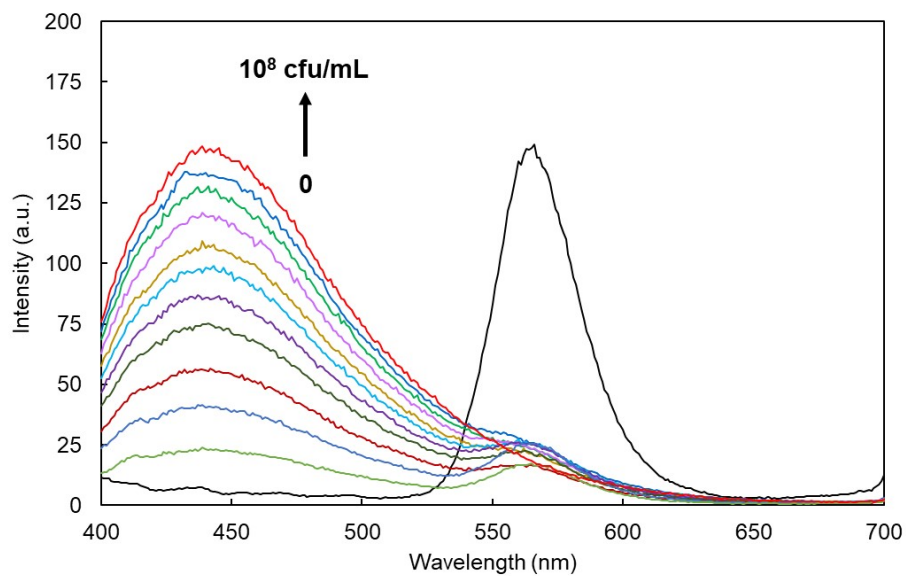

**Fig. S4** Full-range fluorescence spectra (400–700 nm) for *E. coli* detection using SiNP@QD-Ab at varying concentrations of 0– $10^8$  CFU/mL.

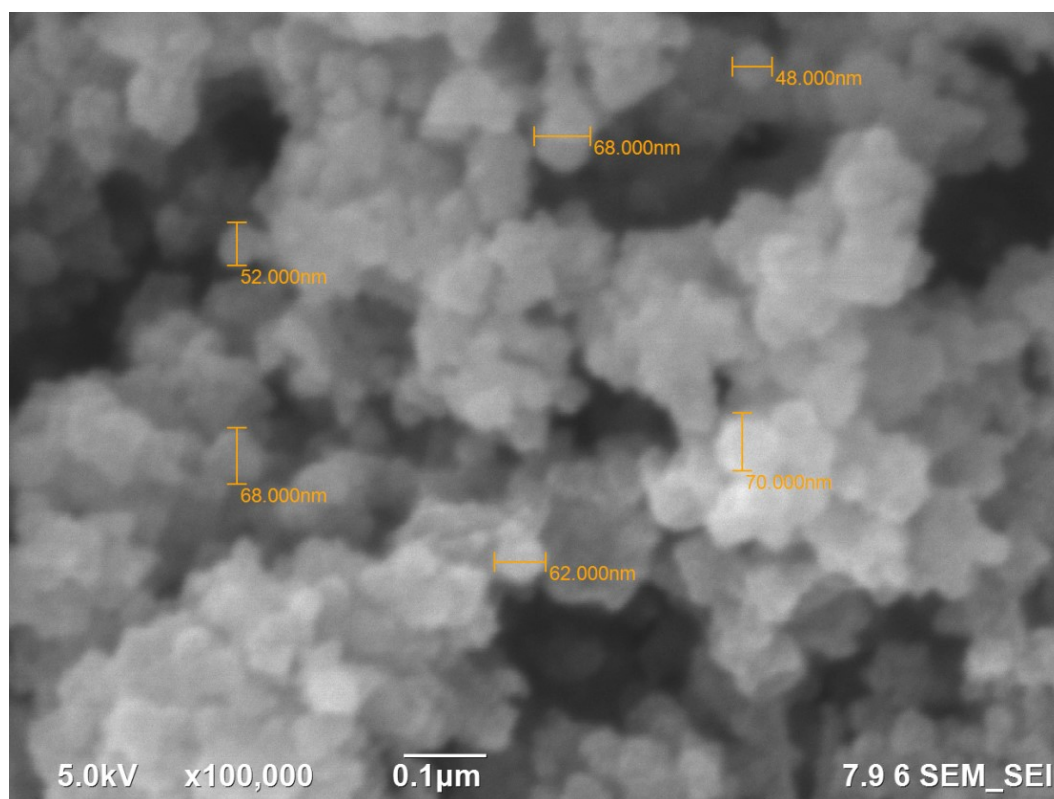

**Fig. S5** FESEM micrograph of SiNP@QD-Ab showing the size of the particles.

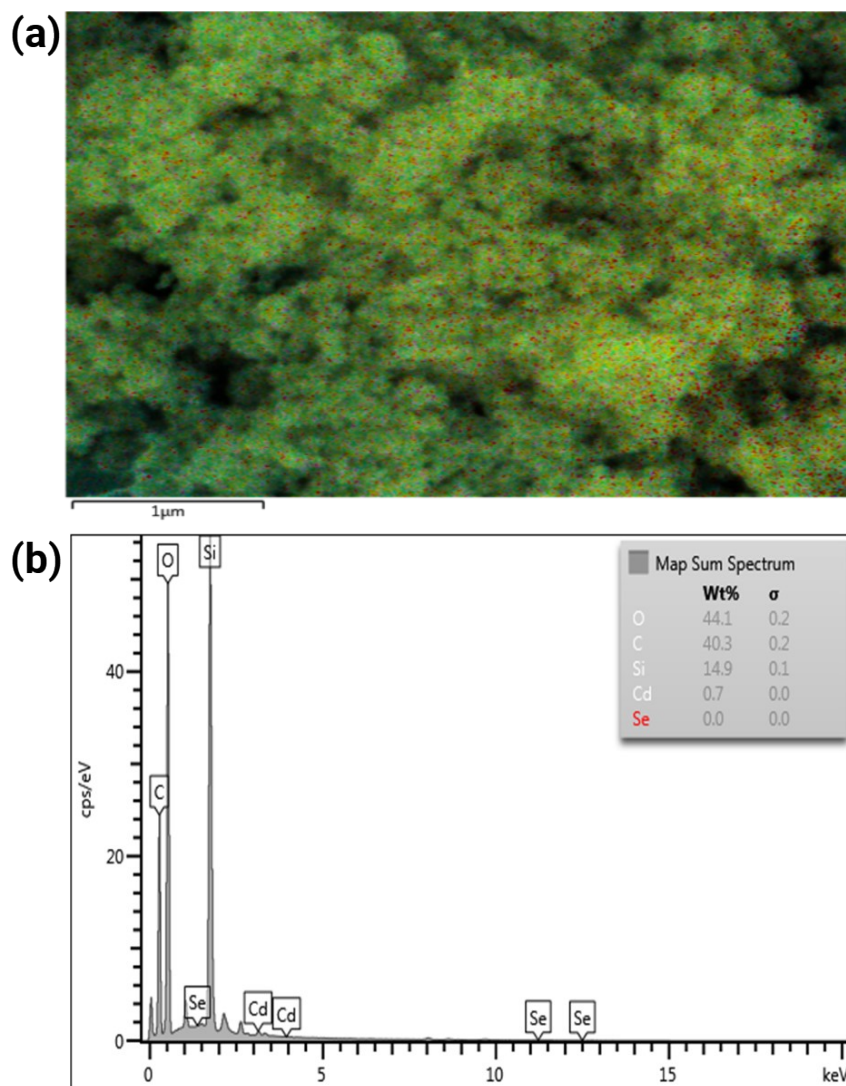

**Fig. S6** Energy-dispersive X-ray spectroscopy of SiNP@QD-Ab showing total layered (a) and (b) energy-dispersive X-ray spectra showing the amount of O, C, Si, and layer of CdSe.

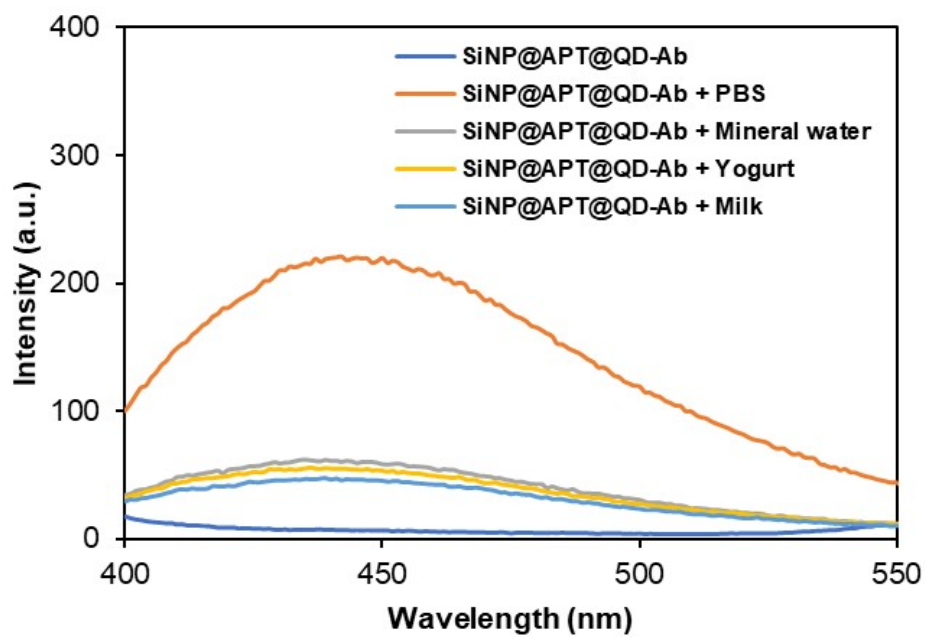

**Fig. S7** Fluorescence spectra at 435 nm excitation for *E. coli* detection using SiNP@QD-Ab in PBS and various food samples with 15 minutes of incubation time. All measurements were made in triplicate.
